## Correction for: Suppressing the KIF20A/NUAK1/Nrf2/GPX4 signaling pathway induces ferroptosis and enhances the sensitivity of colorectal cancer to oxaliplatin

Changshun Yang<sup>1,\*</sup>, Yu Zhang<sup>2,\*</sup>, Shengtao Lin<sup>1,\*</sup>, Yi Liu<sup>3</sup>, Weihua Li<sup>1</sup>

<sup>1</sup>Department of Surgical Oncology, Fujian Provincial Hospital, Fuzhou 350001, China

<sup>2</sup>Department of Pathology, The First Affiliated Hospital of Fujian Medical University, Fuzhou 350001, China

<sup>3</sup>Department of Endoscopy, National Cancer Center/Cancer Hospital, Chinese Academy of Medical Science and Peking Union Medical College, Beijing 100000, China

\*Equal contribution

Correspondence to: Weihua Li; email: [liwh68@sina.com](mailto:liwh68@sina.com)

Original article: *Aging (Albany NY)* 2020; 13: 13515 – 13534

PMID: [33819186](https://pubmed.ncbi.nlm.nih.gov/33819186/)

PMCID: [PMC7950286](https://pubmed.ncbi.nlm.nih.gov/PMC7950286/)

DOI: [10.18632/aging.202774](https://doi.org/10.18632/aging.202774)

**This article has been corrected:** The authors requested to update Funding information. The authors declare that these corrections do not change the results or conclusions of this work.

### FUNDING

This work was supported by the Youth Scientific Research Project of Fujian Provincial Health, Family Planning Commission (grant number 2018-2-5) and the Sail Fund of Fujian Medical University (grant number 2017XQ1151), and Foundation of 2020 Fujian Provincial Department of Finance Health and Health Provincial Special Subsidy.
